# Supplementary material
Source: MDPI journal article supplement (https://www.mdpi.com/2411-5134/5/1/2)
Supplement: s1 [file s1]

# An Electroporation Device with Microbead-Enhanced Electric Field for Bacterial Inactivation

Sanam Pudasaini<sup>1</sup>, A T K Perera<sup>2</sup>, Syed. S. U. Ahmed<sup>2</sup>, Yong Bing Chong<sup>1</sup>, Sum Huan Ng<sup>3</sup> and Chun Yang<sup>1,\*</sup>

<sup>1</sup>School of Mechanical and Aerospace Engineering, Nanyang Technological University, 50 Nanyang Avenue, Singapore 639798

<sup>2</sup>Interdisciplinary Graduate School, Nanyang Technological University, 50 Nanyang Avenue, Singapore 639798

<sup>3</sup>Singapore Institute of Manufacturing Technology (SIMTech), 2 Fusionopolis Way, Singapore 138634

\*Chun Yang: mcyang@ntu.edu.sg

## S1. DEP Response

The time-averaged dielectrophoresis force experienced by the particles is given by (Pethig 2010)

$$F_{DEP} = 2\pi R^3 \epsilon_m \operatorname{Re} \left( \frac{\epsilon_p^* - \epsilon_m^*}{\epsilon_p^* + 2\epsilon_m^*} \right) \nabla |E|^2 \quad 1$$

where  $\nabla |E|^2 = \nabla (E \cdot E^*)$  is the gradient of the squared electric field,  $F_{cm} = \frac{\epsilon_p^* - \epsilon_m^*}{\epsilon_p^* + 2\epsilon_m^*}$  is the

Clausius–Mossotti (CM) factor, and  $\epsilon^* = \epsilon - j(\sigma / \omega)$  is the complex permittivity. Based on the sign of the CM factor, DEP can be of two types: negative DEP (nDEP) or positive DEP (pDEP). For the DC field ( $\omega = 0$ ) cases, the CM factor can be calculated as

$$F_{cm} = \frac{\sigma_p - \sigma_m}{\sigma_p + 2\sigma_m}.$$

Under a DC electric field, cells act as perfect insulators,  $\sigma_p = 0$ , which results in  $F_{cm}$  being  $-0.5$ . This suggests that bacterial cells experience nDEP inside our device under a DC electric field. Meanwhile, for an AC field,  $F_{cm}$  changes with frequency as shown in Figure S1. The plot suggests that for AC electric fields, bacteria experience pDEP under our operating conditions.

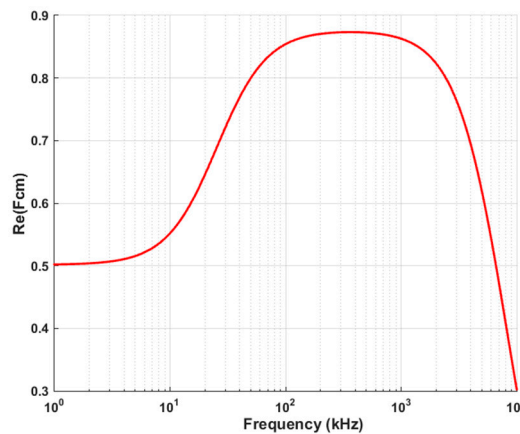

**Figure S1:** The Clausius–Mossotti (CM) factor calculated for live *E. coli* suspended in DI water for various frequencies.

## S2. Our Electroporation Device and Setup

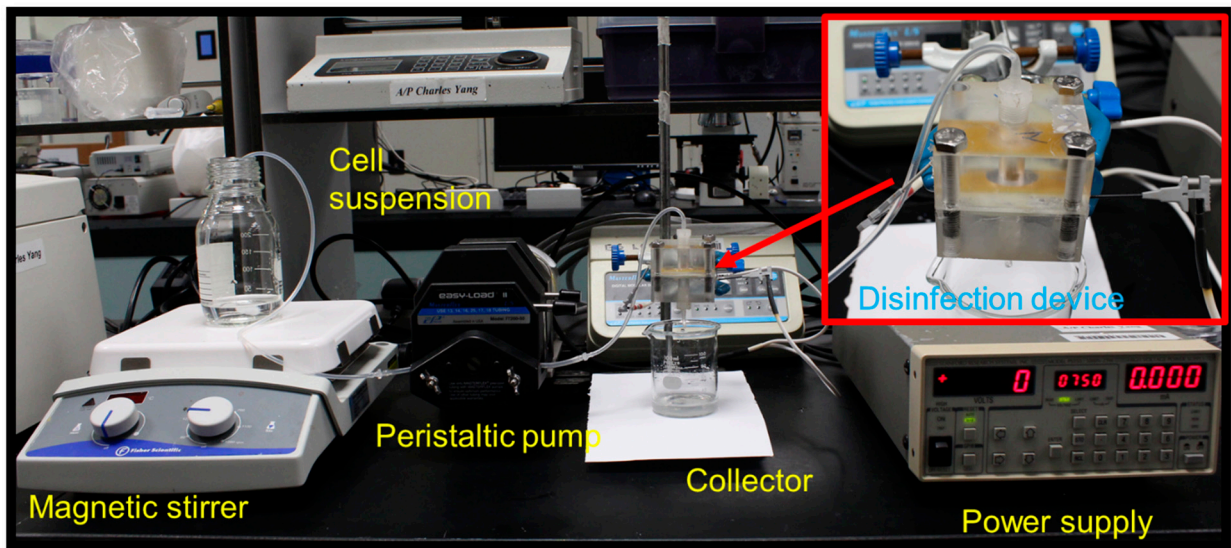

**Figure S2:** Actual setup with an enlarged view showing the electroporation device with electrical connections and fluidic access.

## S3. Energy Consumption Estimation

| HRT (s) | Flux (mL/s) | Voltage (V) | Current (mA) | Energy consumption (kJ/L) |
|---------|-------------|-------------|--------------|---------------------------|
| 6.08    | 0.06        | 400         | 2.15         | 12.90                     |

$$\text{Energy consumption} = \frac{V * I}{\text{Flux}}$$
